# Supplementary material for: The Microtubule Regulatory Protein Stathmin Is Required to Maintain the Integrity of Axonal Microtubules in Drosophila
Source: PLoS One. 2013 Jun 26;8(6):e68324. doi: 10.1371/journal.pone.0068324 (PMC3694009; doi:10.1371/journal.pone.0068324)
Supplement: Table S5 — The average pixel intensity of acetylated α-tubulin immunostained segmental nerve axons was determined as described in the Materials and Methods. Average pixel intensity is reported as mean ± S.D. in arbitrary units (a.u.) of fluorescence. (XLSX) [file pone.0068324.s015.xlsx]

## Sheet: Summary Table (2)
	Supplemental Table 5 - Average Pixel Intensity of Acetylated Tubulin Immunostaining in
	the Segmental Nerve Axons of Drosophila Third Instar Larvae.
		Wildtype	staiB200/+	staiB200	staiB200/Df	staiexcision	staiB200; tub-staiB2/+	staiB200; tub-STMN1/+
	Number of L3 Larvae Analyzed	n=5	n=5	n=12	n=5	n=5	n=5	n=5
	Number of Axon Segments Analyzed	n=70	n=110	n=230	n=125	n=100	n=80	n=115
	Total Length of Axon Segments Analyzed (mm)	10115	11342	23639	14990	10035	11443	15295
	Total Pixels Analyzed	5.18 x 106	4.99 x 106	1.32 x 107	7.59 x 106	5.00 x 106	6.50 x 106	7.78 x 106
	Total Area Analyzed (mm2)	90039.9	86609.7	227678	131813	86790.1	112793	135056
	Average Pixel Intensity (Mean ± S.D)	20600 ± 6800	15700 ± 5400	10800 ± 4500	9800 ± 2700	19500 ± 5800	13400 ± 4500	12200 ± 3300
